# Supplementary material
Source: PubMed Central journal article supplement (PMC4174348)
Supplement: NIHMS626159-supplement-01.pdf [file NIHMS626159-supplement-01.pdf]

# THE LANCET **Oncology**

## **Supplementary appendix**

This appendix formed part of the original submission and has been peer reviewed. We post it as supplied by the authors.

Supplement to: Burger JA, Keating MJ, Wierda WG, et al. Safety and activity of ibrutinib plus rituximab for patients with high-risk chronic lymphocytic leukaemia: a single-arm, phase 2 study. *Lancet Oncol* 2014; published online Aug 21. [http://dx.doi.org/10.1016/S1470-2045\(14\)70335-3](http://dx.doi.org/10.1016/S1470-2045(14)70335-3).

## Supplementary Index

Burger, Keating, Wierda et al:

**“The combination of ibrutinib and rituximab (iR) is well tolerated and induces a high rate of durable remissions in patients with high-risk Chronic Lymphocytic Leukemia (CLL)”**

### **A. Extended Experimental Procedures**

#### *Patients*

The EORTC QLQ-C30 (version 3.0), a 30-item core questionnaire developed by the EORTC, was used to assess health-related quality of life (QOL) at baseline, after 2 weeks, and after months 1, 3, 6, and 12. EORTC-QOL raw scores on global health status subscale were summarized using standard descriptive statistics and measures of central tendency, including frequencies, means, medians, range, and standard deviations. The answers to questionnaires were scored according to instructions described in the EORTC QLQ-C30 Manual (ISBN 2-9300 64-22-6) and missing values were scored following the method proposed by Aaronson<sup>1</sup>.

#### *BTK occupancy test (probe assay)*

Occupancy test was performed as previously described.<sup>2</sup> Briefly,  $1 \times 10^7$  B-ALL cells were incubated in regular growth medium in presence of 0.1% DMSO or increasing concentrations of ibrutinib (0.0001-1.0  $\mu\text{M}$ ) for 1 hour. Then cells were collected by centrifugation and lysed by 4 freeze/thaw cycles. Protein concentration was determined using Bio-Rad DC Protein Assay Kit (Bio-Rad). Equal amounts of total protein were labelled with 2.5  $\mu\text{M}$  PCI-33380 for 1 hour. The reaction mixtures were resolved by SDS/PAGE electrophoresis, gels were scanned using Typhoon FLA7000 Imager (Ex. 532/ Em. 555). Next gels were blotted and membranes stained for BTK and GAPDH.

#### *Chemotaxis assay*

The chemotaxis assay across polycarbonate transwell inserts was performed as described<sup>3</sup>. Briefly, 15 CLL samples ( $1 \times 10^7$  cells/ml) were incubated in complete RPMI medium (control) or in complete medium supplemented with 10  $\mu\text{g/ml}$  of anti-IgM at 37°C in 5% CO<sub>2</sub>. After 48 hours, CLL cells were suspended to a concentration of  $1 \times 10^7$  cells/ml in RPMI1640 with 0.5% BSA and a total of 100  $\mu\text{l}$ , containing  $1 \times 10^6$  cells, was added to the top chamber of a 6.5-mm diameter transwell culture inserts (Costar, Cambridge, MA, USA) with a pore size of 5  $\mu\text{m}$ . Filters then were transferred to wells containing medium with or without 200ng/mL of CXCL12 (Upstate, Charlottesville, VA) or 1  $\mu\text{g/ml}$  of CXCL13 (R&D Systems, Minneapolis, MN). The chambers were incubated for 3 hours at 37°C in 5% CO<sub>2</sub>. After this incubation, the cells in the lower chamber were suspended and divided into aliquots for counting with a FACSCalibur for 20 seconds at 60  $\mu\text{L/min}$  in duplicates. A 1:20 dilution of input cells was counted under the same conditions.

#### *Gene expression analysis*

In order to purify the CLL B cells prior to RNA isolation, CLL PBMC were passed through a 30  $\mu\text{m}$  nylon mesh to obtain a single-cell suspension. Then CLL B cells were purified with CD19 MicroBeads. Using TRIzol from Invitrogen, B cells were lysed according to the manufacturer’s instructions (Invitrogen, Carlsbad, CA).

Total RNA extraction then was performed with the PureLink Micro-to-Midi Total RNA Purification System as described by the manufacturer (Invitrogen). The RNA was quantified using a NanoDrop 1000 spectrophotometer (Fisher Scientific, Pittsburgh, PA). Gene expression studies were performed using HG U133 plus 2.0 oligonucleotide arrays from Affymetrix (Affymetrix, Santa Clara, CA). The samples were processed following the protocol for eukaryotic samples in the expression analysis technical manual from Affymetrix (available at [www.affymetrix.com](http://www.affymetrix.com)). In detail, cDNA synthesis was performed with a starting amount of 1-2  $\mu\text{g}$  total RNA using the One-cycle cDNA synthesis kit (Affymetrix) following the Affymetrix standard protocol. Double stranded cDNA and cRNA was purified with the GeneChip sample clean-up module. Synthesis of biotin-labelled cRNA was performed using the IVT labelling kit from Affymetrix, followed by clean-up and fragmentation. After 16 h of hybridization at 45°C the arrays were washed, stained (Fluidics Station 450) and laser scanned (Affymetrix GC scanner 3000) following the Affymetrix manual. The array images were visually checked for hybridization irregularities. The average probe array signals were scaled to a target signal of 500 by using the GeneChip operating software (GCOS).

## **B. Supplemental Tables**

| True median PFS | Pr(stop) | Mean number of patients (25%, 75%) |
|-----------------|----------|------------------------------------|
| 3 months        | 0.975    | 23.3 (14, 33)                      |
| 4 months        | 0.632    | 31.8 (24, 40)                      |
| 5 months        | 0.240    | 36.6 (40, 40)                      |
| 6 months        | 0.078    | 38.6 (40, 40)                      |
| 7 months        | 0.038    | 39.1 (40, 40)                      |
| 8 months        | 0.018    | 39.6 (40, 40)                      |

**TableS1:** Simulation study with maximum 40 patients

| EORTC – QOL- C30 v.3<br>Measure | Questionnaires<br>N=39 |      | Questionnaires<br>N=25  |      | p-value |
|---------------------------------|------------------------|------|-------------------------|------|---------|
|                                 | Mean score<br>baseline | SD   | Mean score<br>12 months | SD   |         |
| Global health status            | 70.9                   | 18.8 | 79.3                    | 10.2 | .04     |
| Functioning scale               |                        |      |                         |      |         |
| Physical                        | 88.0                   | 17.8 | 95.5                    | 20.0 | .12     |
| Role                            | 90.2                   | 19.0 | 96.0                    | 12.0 | .18     |
| Social                          | 81.6                   | 22.9 | 94.7                    | 20.8 | .02     |
| Emotional                       | 83.8                   | 14.5 | 94.7                    | 20.8 | .02     |
| Cognitive                       | 92.3                   | 12.6 | 97.3                    | 10.4 | .10     |
| Symptom scale                   |                        |      |                         |      |         |
| Nausea/vomiting                 | 20.5                   | 14.0 | 0                       |      | ≤.001   |
| Pain                            | 13.2                   | 25.1 | 2.7                     | 13.3 | .06     |
| Fatigue                         | 24.8                   | 23.7 | 4.4                     | 14.0 | ≤.001   |
| Single item                     |                        |      |                         |      |         |
| Insomnia                        | 24.8                   | 26.2 | 1.3                     | 6.7  | ≤.001   |
| Appetite loss                   | 10.2                   | 17.4 | 0                       |      | .004    |
| Diarrhoea                       | 2.6                    | 9.0  | 6.7                     | 13.6 | .15     |
| Constipation                    | 6.0                    | 15.0 | 4.0                     | 20.0 | .65     |
| Dyspnoea                        | 19.6                   | 27.3 | 2.7                     | 9.2  | .003    |
| Financial impact                | 12.0                   | 20.9 | 2.7                     | 13.3 | .05     |

**Table S2:** Quality of life in CLL patients before (baseline) and after 12 months of treatment with iR. There were significant improvements in global health, functional and symptom scales, and other items.

|   | Age, gender (M/F) | FISH CG, hierarchical | On study (# of cycles) | Reason for discontinuation   | Best response | Post-progression treatments                                    | Cause of death                      |
|---|-------------------|-----------------------|------------------------|------------------------------|---------------|----------------------------------------------------------------|-------------------------------------|
| 1 | 69, M             | 11q                   | 15                     | Death in remission           | PR            | NA                                                             | Unknown (passed away in his sleep)  |
| 2 | 36, F             | 11q                   | 6                      | Progressive disease          | PR            | None                                                           | Pneumonia, sepsis                   |
| 3 | 58, F             | 17p                   | 5                      | Mucositis                    | SD            | NA                                                             | N/A                                 |
| 4 | 64, M             | 17p                   | 16                     | Ear and pulmonary infections | PR            | Poly-chemotherapy for Richter's transformation                 | Pneumonia, Richter's transformation |
| 5 | 77, M             | 17p, 11q              | 2                      | Pneumonia, brain abscess     | NR            | NA                                                             | Pneumonia, brain abscess            |
| 6 | 66, F             | 11q                   | 13                     | Richter's transformation     | PR            | PI3 kinase inhibitor, high-dose corticosteroids plus rituximab | Richter's transformation            |
| 7 | 83, M             | 17p                   | 8                      | Progressive COPD and CHF     | PR            | NA                                                             | Progressive COPD and CHF            |
| 8 | 74, F             | 17p                   | 11                     | Progressive disease          | PR            | None                                                           | Progressive disease                 |
| 9 | 62, M             | 17p, 11q              | 5                      | Resistant pneumonia          | PR            | NA                                                             | Resistant pneumonia                 |

**TableS3:** Patients who discontinued iR therapy: reasons for study discontinuation and outcome.

| <b>Related adverse events</b>                 | <b>Grade 1</b> | <b>Grade 2</b> | <b>Grade 3</b> | <b>Grade 4</b> |
|-----------------------------------------------|----------------|----------------|----------------|----------------|
| Lung Infection                                | 5 (13%)        | 9 (23%)        | 2 (5%)         |                |
| Diarrhoea                                     | 9 (23%)        | 1 (3%)         |                |                |
| Neutropenia                                   |                |                | 1 (3%)         | 1 (3%)         |
| Fatigue                                       | 4 (10%)        | 3 (8%)         |                |                |
| Upper respiratory infection                   | 3 (8%)         | 10 (25%)       | 1 (3%)         |                |
| Nausea/Acid reflux                            | 10 (25%)       | 3 (8%)         |                |                |
| Arthralgia                                    | 8 (20%)        | 3 (8%)         |                |                |
| Transaminase increase                         |                |                | 1 (3%)         |                |
| Bleeding events (Bruising/Rash/<br>Epistaxis) | 8 (20%)        | 5 (13%)        |                |                |
| Peripheral neuropathy                         | 1 (3%)         | 1 (3%)         | 1 (3%)         |                |
| Weight gain                                   |                | 4 (10%)        |                |                |
| Eye disorders (itching/watery eyes)           | 1 (3%)         | 2 (5%)         |                |                |
| Mucositis                                     | 1 (3%)         | 1 (3%)         | 1 (3%)         |                |
| Constipation                                  | 1 (3%)         |                |                |                |
| Alopecia                                      | 1 (3%)         |                |                |                |
| Atrial Fibrillation                           | 1 (3%)         | 1 (3%)         |                |                |
| <b>Unrelated adverse events</b>               | <b>Grade 1</b> | <b>Grade 2</b> | <b>Grade 3</b> | <b>Grade 4</b> |
| UTI (Urinary tract infection)                 |                | 3 (8%)         |                |                |
| Insomnia                                      |                | 4 (10%)        |                |                |
| Headache                                      | 3 (8%)         |                |                |                |
| Anaemia                                       | 1 (3%)         | 2 (5%)         |                |                |
| Osteoporosis                                  |                | 1 (3%)         |                |                |
| Hot flashes                                   |                | 2 (5%)         |                |                |
| Constipation                                  | 1 (3%)         | 2 (5%)         |                |                |
| Nausea/vomiting                               |                | 2 (5%)         |                |                |
| Anxiety                                       |                | 2 (5%)         |                |                |
| Dry mouth                                     | 1 (3%)         | 1 (3%)         |                |                |
| Dyspnoea                                      |                | 1 (3%)         |                |                |
| Subdural haematoma                            |                |                | 1 (3%)         |                |
| Sepsis                                        |                |                | 1 (3%)         |                |

**Table S4: Related and unrelated adverse events**

| <b>log2 fold<br/>GE change</b> | <b>Gene</b>  | <b>Description</b>                                                                                            | <b>Well ID</b> | <b>Feature ID</b> |
|--------------------------------|--------------|---------------------------------------------------------------------------------------------------------------|----------------|-------------------|
| -1.9894625                     |              | Transcribed locus                                                                                             | 1461881        | 215565_at         |
| -1.7917125                     | PIGR         | polymeric immunoglobulin receptor (PIGR), mRNA.                                                               | 1503168        | 226147_s_at       |
| -1.7607625                     | CCL3         | chemokine (C-C motif) ligand 3 (CCL3), mRNA.                                                                  | 1493951        | 205114_s_at       |
| -1.72925                       | CCL5         | chemokine (C-C motif) ligand 5 (CCL5), transcript variant 1, mRNA.                                            | 1506815        | 1555759_a_at      |
| -1.7281125                     | CD1C         | CD1c molecule (CD1C), mRNA.                                                                                   | 1457096        | 205987_at         |
| -1.5580625                     | EGR3         | early growth response 3 (EGR3), transcript variant 1, mRNA.                                                   | 1457170        | 206115_at         |
| -1.5479                        | SFTPB        | surfactant protein B (SFTPB), transcript variant 1, mRNA.                                                     | 1454143        | 37004_at          |
| -1.525875                      | SLCO4A1      | solute carrier organic anion transporter family, member 4A1 (SLCO4A1), mRNA.                                  | 1500721        | 219911_s_at       |
| -1.4978375                     | FCRL5        | Fc receptor-like 5                                                                                            | 1502795        | 224404_s_at       |
| -1.4345875                     | PIGR         | Polymeric immunoglobulin receptor                                                                             | 1503691        | 229659_s_at       |
| -1.4227625                     | TP53I3       | tumor protein p53 inducible protein 3 (TP53I3), transcript variant 1, mRNA.                                   | 1496618        | 210609_s_at       |
| -1.405025                      | CCL5         | chemokine (C-C motif) ligand 5 (CCL5), transcript variant 1, mRNA.                                            | 1454449        | 1405_i_at         |
| -1.404175                      | OAS3         | 2'-5'-oligoadenylate synthetase 3, 100kDa (OAS3), mRNA.                                                       | 1463481        | 218400_at         |
| -1.3926875                     | PHACTR1      | phosphatase and actin regulator 1 (PHACTR1), transcript variant 1, mRNA.                                      | 1460764        | 213638_at         |
| -1.3912125                     | YME1L1       | YME1-like 1 (S. cerevisiae)                                                                                   | 1499571        | 217143_s_at       |
| -1.3855625                     |              | CDNA FLJ41339 fis, clone BRASW1000053                                                                         | 1476553        | 236099_at         |
| -1.366725                      | MT1HL1       | metallothionein 1H-like 1 (MT1HL1), mRNA.                                                                     | 1497197        | 211456_x_at       |
| -1.2947875                     | FCRL3        | Fc receptor-like 3 (FCRL3), mRNA.                                                                             | 1506001        | 1553196_a_at      |
| -1.26805                       | EGR1         | early growth response 1 (EGR1), mRNA.                                                                         | 1492182        | 201694_s_at       |
| -1.25985                       | IFI30        | interferon, gamma-inducible protein 30 (IFI30), mRNA.                                                         | 1454801        | 201422_at         |
| -1.2576375                     | TLR10        | toll-like receptor 10 (TLR10), transcript variant 1, mRNA.                                                    | 1502493        | 223750_s_at       |
| -1.2473625                     | DNP1         | 2'-deoxynucleoside 5'-phosphate N-hydrolase 1 (DNP1), transcript variant 1, mRNA.                             | 1493545        | 204238_s_at       |
| -1.23035                       | BIK          | BCL2-interacting killer (apoptosis-inducing) (BIK), mRNA.                                                     | 1456963        | 205780_at         |
| -1.2161875                     | ADA          | adenosine deaminase (ADA), mRNA.                                                                              | 1499388        | 216705_s_at       |
| -1.2124625                     | LILRA4       | leukocyte immunoglobulin-like receptor, subfamily A (with TM domain), member 4 (LILRA4), mRNA.                | 1459212        | 210313_at         |
| -1.1734375                     | CTNS         | cystinosis, lysosomal cystine transporter (CTNS), transcript variant 2, mRNA.                                 | 1456453        | 204925_at         |
| -1.1712                        | GRN          | granulin (GRN), mRNA.                                                                                         | 1497082        | 211284_s_at       |
| -1.1684375                     | MS4A1        | membrane-spanning 4-domains, subfamily A, member 1 (MS4A1), transcript variant 3, mRNA.                       | 1499700        | 217418_x_at       |
| -1.16455                       | MS4A1        | membrane-spanning 4-domains, subfamily A, member 1 (MS4A1), transcript variant 3, mRNA.                       | 1496472        | 210356_x_at       |
| -1.1638125                     | YME1L1       | YME1-like 1 (S. cerevisiae)                                                                                   | 1499159        | 216191_s_at       |
| -1.15785                       | ZBTB32       | zinc finger and BTB domain containing 32 (ZBTB32), mRNA.                                                      | 1464555        | 220118_at         |
| -1.150275                      | MS4A1        | membrane-spanning 4-domains, subfamily A, member 1 (MS4A1), transcript variant 3, mRNA.                       | 1470291        | 228599_at         |
| -1.148625                      | PHACTR1      | PREDICTED: phosphatase and actin regulator 1 (PHACTR1), transcript variant X1, mRNA.                          | 1503200        | 226397_s_at       |
| -1.1316875                     | PLEK         | pleckstrin (PLEK), mRNA.                                                                                      | 1493174        | 203471_s_at       |
| -1.1233875                     | HIST1H1E     | histone cluster 1, H1e (HIST1H1E), mRNA.                                                                      | 1458459        | 208553_at         |
| -1.115775                      | CAV1         | caveolin 1, caveolae protein, 22kDa (CAV1), transcript variant 1, mRNA.                                       | 1459698        | 212097_at         |
| -1.111675                      | GM2A         | GM2 ganglioside activator (GM2A), transcript variant 1, mRNA.                                                 | 1460163        | 212737_at         |
| -1.111125                      | PPAPDC1<br>B | PREDICTED: phosphatidic acid phosphatase type 2 domain containing 1B (PPAPDC1B), transcript variant X3, mRNA. | 1468189        | 226150_at         |
| -1.11085                       | EGR2         | early growth response 2 (EGR2), transcript variant 1, mRNA.                                                   | 1456644        | 205249_at         |

|            |              |                                                                                                                                |         |              |
|------------|--------------|--------------------------------------------------------------------------------------------------------------------------------|---------|--------------|
| -1.1095125 | LOC101927402 | PREDICTED: uncharacterized LOC101927402 (LOC101927402), mRNA.                                                                  | 1478773 | 238559_at    |
| -1.0992375 | SFTPB        | surfactant protein B (SFTPB), transcript variant 1, mRNA.                                                                      | 1458978 | 209810_at    |
| -1.0929875 |              | Transcribed locus                                                                                                              | 1507595 | 1559067_a_at |
| -1.0928875 | PTPLA        | protein tyrosine phosphatase-like (proline instead of catalytic arginine), member A (PTPLA), mRNA.                             | 1464238 | 219654_at    |
| -1.087375  | BZRAP1-AS1   | BZRAP1 antisense RNA 1 (BZRAP1-AS1), transcript variant 1, long non-coding RNA.                                                | 1470484 | 228828_at    |
| -1.0866375 | FCRL5        | Fc receptor-like 5                                                                                                             | 1466824 | 224405_at    |
| -1.0863375 |              | Transcribed locus                                                                                                              | 1479440 | 239287_at    |
| -1.0808625 | KMO          | kynurenine 3-monooxygenase (kynurenine 3-hydroxylase) (KMO), mRNA.                                                             | 1494029 | 205306_x_at  |
| -1.0804375 | CHI3L2       | chitinase 3-like 2 (CHI3L2), transcript variant 1, mRNA.                                                                       | 1497928 | 213060_s_at  |
| -1.079025  | APOBEC3G     | apolipoprotein B mRNA editing enzyme, catalytic polypeptide-like 3G (APOBEC3G), mRNA.                                          | 1498728 | 214995_s_at  |
| -1.0762875 | YME1L1       | YME1-like 1 ( <i>S. cerevisiae</i> )                                                                                           | 1460869 | 213830_at    |
| -1.07065   | TYMS         | thymidylate synthetase (TYMS), mRNA.                                                                                           | 1455278 | 202589_at    |
| -1.069375  | TRAF4        | TNF receptor-associated factor 4 (TRAF4), mRNA.                                                                                | 1497551 | 211899_s_at  |
| -1.066125  | STAP2        | signal transducing adaptor family member 2 (STAP2), transcript variant 1, mRNA.                                                | 1501456 | 221610_s_at  |
| -1.0544625 | APOBEC3G     | apolipoprotein B mRNA editing enzyme, catalytic polypeptide-like 3G (APOBEC3G), mRNA.                                          | 1456075 | 204205_at    |
| -1.0533375 | TRAF4        | TNF receptor-associated factor 4 (TRAF4), mRNA.                                                                                | 1482245 | 242473_at    |
| -1.046575  | LILRB4       | leukocyte immunoglobulin-like receptor, subfamily B (with TM and ITIM domains), member 4 (LILRB4), transcript variant 1, mRNA. | 1459124 | 210152_at    |
| -1.0461625 | DCAF12       | DDB1 and CUL4 associated factor 12 (DCAF12), mRNA.                                                                             | 1467039 | 224789_at    |
| -1.03775   | IL2RB        | interleukin 2 receptor, beta (IL2RB), mRNA.                                                                                    | 1456669 | 205291_at    |
| -1.0367    | APOBEC3B     | apolipoprotein B mRNA editing enzyme, catalytic polypeptide-like 3B (APOBEC3B), transcript variant 1, mRNA.                    | 1494531 | 206632_s_at  |
| -1.0234875 | RHOF         | ras homolog family member F (in filopodia) (RHOF), mRNA.                                                                       | 1506408 | 1554539_a_at |
| -1.0232125 | NME1         | NME/NM23 nucleoside diphosphate kinase 1 (NME1), transcript variant 2, mRNA.                                                   | 1454867 | 201577_at    |
| -1.02245   | TOP2A        | topoisomerase (DNA) II alpha 170kDa (TOP2A), mRNA.                                                                             | 1454746 | 201292_at    |
| -1.02075   | FMO1         | flavin containing monooxygenase 1 (FMO1), transcript variant 2, mRNA.                                                          | 1456894 | 205666_at    |
| -1.020075  | FOS          | FBJ murine osteosarcoma viral oncogene homolog (FOS), mRNA.                                                                    | 1458683 | 209189_at    |
| -1.0185625 | E2F1         | E2F transcription factor 1 (E2F1), mRNA.                                                                                       | 1456464 | 204947_at    |
| -1.01835   | HILPDA       | hypoxia inducible lipid droplet-associated (HILPDA), transcript variant 1, mRNA.                                               | 1463537 | 218507_at    |
| -1.015775  | GEM          | GTP binding protein overexpressed in skeletal muscle (GEM), transcript variant 1, mRNA.                                        | 1456209 | 204472_at    |
| -1.0144875 |              | Transcribed locus                                                                                                              | 1487064 | 1559066_at   |
| -1.011575  | CCL5         | chemokine (C-C motif) ligand 5 (CCL5), transcript variant 1, mRNA.                                                             | 1456315 | 204655_at    |

**Tables S4: Most down-regulated genes after 7 days of treatment with ibrutinib plus rituximab.**



| log2 fold GE change | Gene      | Description                                                                                        | Well ID     | Feature ID       |
|---------------------|-----------|----------------------------------------------------------------------------------------------------|-------------|------------------|
| -2.41485            | PIGR      | polymeric immunoglobulin receptor (PIGR), mRNA.                                                    | 1503<br>168 | 226147_<br>s_at  |
| -2.2884             | FCRL3     | Fc receptor-like 3 (FCRL3), mRNA.                                                                  | 1506<br>001 | 1553196<br>_a_at |
| -2.2717125          |           | Transcribed locus                                                                                  | 1461<br>881 | 215565_<br>at    |
| -2.2492             | MS4A1     | membrane-spanning 4-domains, subfamily A, member 1 (MS4A1), transcript variant 3, mRNA.            | 1496<br>472 | 210356_<br>x_at  |
| -2.222225           | MS4A1     | membrane-spanning 4-domains, subfamily A, member 1 (MS4A1), transcript variant 3, mRNA.            | 1470<br>291 | 228599_<br>at    |
| -2.2221625          | MS4A1     | membrane-spanning 4-domains, subfamily A, member 1 (MS4A1), transcript variant 3, mRNA.            | 1499<br>700 | 217418_<br>x_at  |
| -1.9623             | TLR10     | toll-like receptor 10 (TLR10), transcript variant 1, mRNA.                                         | 1502<br>494 | 223751_<br>x_at  |
| -1.9414125          | MS4A1     | membrane-spanning 4-domains, subfamily A, member 1 (MS4A1), transcript variant 3, mRNA.            | 1470<br>284 | 228592_<br>at    |
| -1.9125875          | MS4A1     | Membrane-spanning 4-domains, subfamily A, member 1                                                 | 1472<br>668 | 231418_<br>at    |
| -1.9073             | CHI3L2    | chitinase 3-like 2 (CHI3L2), transcript variant 1, mRNA.                                           | 1497<br>928 | 213060_<br>s_at  |
| -1.834325           |           | Transcribed locus                                                                                  | 1479<br>440 | 239287_<br>at    |
| -1.8176875          | CPNE5     | copine V (CPNE5), mRNA.                                                                            | 1469<br>102 | 227189_<br>at    |
| -1.813975           | CCL5      | chemokine (C-C motif) ligand 5 (CCL5), transcript variant 1, mRNA.                                 | 1456<br>315 | 204655_<br>at    |
| -1.80495            | CD1C      | CD1c molecule (CD1C), mRNA.                                                                        | 1457<br>096 | 205987_<br>at    |
| -1.7973625          | TLR10     | toll-like receptor 10 (TLR10), transcript variant 1, mRNA.                                         | 1502<br>493 | 223750_<br>s_at  |
| -1.790875           | TP53I3    | tumor protein p53 inducible protein 3 (TP53I3), transcript variant 1, mRNA.                        | 1496<br>618 | 210609_<br>s_at  |
| -1.775              | ITGAX     | integrin, alpha X (complement component 3 receptor 4 subunit) (ITGAX), transcript variant 2, mRNA. | 1459<br>146 | 210184_<br>at    |
| -1.758525           | CCL3      | chemokine (C-C motif) ligand 3 (CCL3), mRNA.                                                       | 1493<br>951 | 205114_<br>s_at  |
| -1.738475           | CCL5      | chemokine (C-C motif) ligand 5 (CCL5), transcript variant 1, mRNA.                                 | 1506<br>815 | 1555759<br>_a_at |
| -1.7302875          | AGMAT     | agmatine ureohydrolase (agmatinase) (AGMAT), mRNA.                                                 | 1501<br>480 | 221648_<br>s_at  |
| -1.7217125          | GM2A      | GM2 ganglioside activator (GM2A), transcript variant 1, mRNA.                                      | 1454<br>117 | 35820_a<br>t     |
| -1.7123375          | PIGR      | Polymeric immunoglobulin receptor                                                                  | 1503<br>691 | 229659_<br>s_at  |
| -1.7069625          | LOC339260 | Uncharacterized LOC339260                                                                          | 1488<br>832 | 1562754<br>_at   |
| -1.687625           | KIAA0101  | KIAA0101 (KIAA0101), transcript variant 1, mRNA.                                                   | 1492<br>658 | 202503_<br>s_at  |
| -1.6726875          | CST7      | cystatin F (leukocystatin) (CST7), mRNA.                                                           | 1459<br>118 | 210140_<br>at    |
| -1.663475           |           | Transcribed locus                                                                                  | 1507<br>595 | 1559067<br>_a_at |
| -1.6618875          | PLEK      | pleckstrin (PLEK), mRNA.                                                                           | 1493<br>174 | 203471_<br>s_at  |
| -1.6579375          | HLA-DPB2  | Major histocompatibility complex, class II, DP beta 2 (pseudogene)                                 | 1480<br>066 | 239975_<br>at    |
| -1.6364625          | LILRA4    | leukocyte immunoglobulin-like receptor, subfamily A (with TM domain), member 4 (LILRA4), mRNA.     | 1459<br>212 | 210313_<br>at    |
| -1.63095            | GRN       | granulin (GRN), mRNA.                                                                              | 1497<br>082 | 211284_<br>s_at  |
| -1.587025           | HIST1H2AC | Histone cluster 1, H2ac                                                                            | 1498<br>757 | 215071_<br>s_at  |
| -1.5857625          | FMO1      | flavin containing monooxygenase 1 (FMO1), transcript variant 2, mRNA.                              | 1456<br>894 | 205666_<br>at    |
| -1.5826125          | P2RX5     | purinergic receptor P2X, ligand-gated ion channel, 5 (P2RX5), transcript variant 1, mRNA.          | 1496<br>525 | 210448_<br>s_at  |

|            |               |                                                                                                               |             |                  |
|------------|---------------|---------------------------------------------------------------------------------------------------------------|-------------|------------------|
| -1.57235   | RHOF          | ras homolog family member F (in filopodia) (RHOF), mRNA.                                                      | 1506<br>408 | 1554539<br>_a_at |
| -1.5503125 | DNPH1         | 2'-deoxynucleoside 5'-phosphate N-hydrolase 1 (DNPH1), transcript variant 1, mRNA.                            | 1493<br>545 | 204238_<br>s_at  |
| -1.529575  | GSTZ1         | glutathione S-transferase zeta 1 (GSTZ1), transcript variant 3, mRNA.                                         | 1458<br>845 | 209531_<br>at    |
| -1.522175  | MPEG1         | macrophage expressed 1 (MPEG1), mRNA.                                                                         | 1468<br>793 | 226841_<br>at    |
| -1.5205375 | CCL5          | chemokine (C-C motif) ligand 5 (CCL5), transcript variant 1, mRNA.                                            | 1454<br>449 | 1405_i_<br>at    |
| -1.518125  | GM2A          | GM2 ganglioside activator (GM2A), transcript variant 1, mRNA.                                                 | 1460<br>163 | 212737_<br>at    |
| -1.50075   | YME1L1        | YME1-like 1 ( <i>S. cerevisiae</i> )                                                                          | 1499<br>571 | 217143_<br>s_at  |
| -1.4987625 | IL17RB        | interleukin 17 receptor B (IL17RB), mRNA.                                                                     | 1502<br>648 | 224156_<br>x_at  |
| -1.498325  | PTPLA         | protein tyrosine phosphatase-like (proline instead of catalytic arginine), member A (PTPLA), mRNA.            | 1464<br>238 | 219654_<br>at    |
| -1.484725  | LOC101927402  | PREDICTED: uncharacterized LOC101927402 (LOC101927402), mRNA.                                                 | 1478<br>773 | 238559_<br>at    |
| -1.473275  | CLECL1        | C-type lectin-like 1 (CLECL1), transcript variant 1, mRNA.                                                    | 1483<br>950 | 244413_<br>at    |
| -1.4668    | HN1           | hematological and neurological expressed 1 (HN1), transcript variant 1, mRNA.                                 | 1463<br>167 | 217755_<br>at    |
| -1.4499125 |               | Full length insert cDNA clone YI54A07                                                                         | 1485<br>995 | 1556281<br>_at   |
| -1.4469375 | FMOD          | fibromodulin (FMOD), transcript variant 1, mRNA.                                                              | 1455<br>332 | 202709_<br>at    |
| -1.4443875 | PLEK          | pleckstrin (PLEK), mRNA.                                                                                      | 1493<br>173 | 203470_<br>s_at  |
| -1.4366    | PNOC          | prepronociceptin (PNOC), transcript variant 1, mRNA.                                                          | 1457<br>039 | 205901_<br>at    |
| -1.4311375 | PPAPDC1B      | PREDICTED: phosphatidic acid phosphatase type 2 domain containing 1B (PPAPDC1B), transcript variant X3, mRNA. | 1468<br>189 | 226150_<br>at    |
| -1.4291375 | TNFRSF17      | tumor necrosis factor receptor superfamily, member 17 (TNFRSF17), mRNA.                                       | 1457<br>505 | 206641_<br>at    |
| -1.4127875 | HIST1H2BH     | histone cluster 1, H2bh (HIST1H2BH), mRNA.                                                                    | 1495<br>461 | 208546_<br>x_at  |
| -1.4097375 | HILPDA        | hypoxia inducible lipid droplet-associated (HILPDA), transcript variant 1, mRNA.                              | 1463<br>537 | 218507_<br>at    |
| -1.404175  | IFI30         | interferon, gamma-inducible protein 30 (IFI30), mRNA.                                                         | 1454<br>801 | 201422_<br>at    |
| -1.400775  | RNASE6        | ribonuclease, RNase A family, k6 (RNASE6), mRNA.                                                              | 1460<br>725 | 213566_<br>at    |
| -1.398425  | MPEG1         | macrophage expressed 1 (MPEG1), mRNA.                                                                         | 1468<br>774 | 226818_<br>at    |
| -1.3869    | FCRL3         | PREDICTED: Fc receptor-like 3 (FCRL3), transcript variant X3, mRNA.                                           | 1472<br>381 | 231093_<br>at    |
| -1.381825  | ACP5          | acid phosphatase 5, tartrate resistant (ACP5), transcript variant 4, mRNA.                                    | 1456<br>303 | 204638_<br>at    |
| -1.3778    | PHACTR1       | phosphatase and actin regulator 1 (PHACTR1), transcript variant 1, mRNA.                                      | 1460<br>764 | 213638_<br>at    |
| -1.374975  | HIST1H2BD     | histone cluster 1, H2bd (HIST1H2BD), transcript variant 2, mRNA.                                              | 1496<br>249 | 209911_<br>x_at  |
| -1.367625  | LOC102724334  | PREDICTED: histone H2B type F-S-like (LOC102724334), mRNA.                                                    | 1495<br>470 | 208579_<br>x_at  |
| -1.3675875 | ITGB2-AS1     | ITGB2 antisense RNA 1 (ITGB2-AS1), transcript variant 1, long non-coding RNA.                                 | 1503<br>581 | 229041_<br>s_at  |
| -1.3450875 | RP11-960L18.1 | PREDICTED: uncharacterized LOC101928342 (RP11-960L18.1), ncRNA.                                               | 1489<br>134 | 1563263<br>_at   |
| -1.3371625 | RAC2          | ras-related C3 botulinum toxin substrate 2 (rho family, small GTP binding protein Rac2) (RAC2), mRNA.         | 1494<br>831 | 207419_<br>s_at  |
| -1.3349875 | LOC64563      | WDNM1-like pseudogene (LOC645638), non-coding RNA.                                                            | 1471<br>097 | 229566_<br>at    |

|            |                  |                                                                                                       |             |                   |
|------------|------------------|-------------------------------------------------------------------------------------------------------|-------------|-------------------|
| -1.3317875 | SLCO4A1          | solute carrier organic anion transporter family, member 4A1 (SLCO4A1), mRNA.                          | 1500<br>721 | 219911_<br>s_at   |
| -1.32665   | YME1L1           | YME1-like 1 ( <i>S. cerevisiae</i> )                                                                  | 1497<br>554 | 211902_<br>x_at   |
| -1.31925   |                  | Transcribed locus                                                                                     | 1478<br>188 | 237880_<br>at     |
| -1.3145125 | MIR22HG          | MIR22 host gene (non-protein coding) (MIR22HG), transcript variant 1, long non-coding RNA.            | 1461<br>324 | 214696_<br>at     |
| -1.3131625 | IL17RB           | interleukin 17 receptor B (IL17RB), mRNA.                                                             | 1500<br>520 | 219255_<br>x_at   |
| -1.3099875 | KCNG1            | potassium voltage-gated channel, subfamily G, member 1 (KCNG1), mRNA.                                 | 1461<br>259 | 214595_<br>at     |
| -1.300125  | FABP5            | fatty acid binding protein 5 (psoriasis-associated) (FABP5), mRNA.                                    | 1492<br>561 | 202345_<br>s_at   |
| -1.297675  | RASGRP1          | RAS guanyl releasing protein 1 (calcium and DAG-regulated) (RASGRP1), transcript variant 1, mRNA.     | 1456<br>845 | 205590_<br>at     |
| -1.2881625 | HIST1H2<br>BD    | histone cluster 1, H2bd (HIST1H2BD), transcript variant 1, mRNA.                                      | 1501<br>676 | 222067_<br>x_at   |
| -1.2838125 | RAC2             | ras-related C3 botulinum toxin substrate 2 (rho family, small GTP binding protein Rac2) (RAC2), mRNA. | 1498<br>109 | 213603_<br>s_at   |
| -1.27555   | YME1L1           | YME1-like 1 ( <i>S. cerevisiae</i> )                                                                  | 1499<br>159 | 216191_<br>s_at   |
| -1.27465   | GCHFR            | GTP cyclohydrolase I feedback regulator (GCHFR), mRNA.                                                | 1456<br>428 | 204867_<br>at     |
| -1.2728375 | EGR3             | early growth response 3 (EGR3), transcript variant 1, mRNA.                                           | 1457<br>170 | 206115_<br>at     |
| -1.271325  | ADAM8            | ADAM metallopeptidase domain 8 (ADAM8), transcript variant 1, mRNA.                                   | 1493<br>986 | 205180_<br>s_at   |
| -1.2617375 | ZBTB32           | zinc finger and BTB domain containing 32 (ZBTB32), mRNA.                                              | 1464<br>555 | 220118_<br>at     |
| -1.2563625 | BIK              | BCL2-interacting killer (apoptosis-inducing) (BIK), mRNA.                                             | 1456<br>963 | 205780_<br>at     |
| -1.25525   | OAS3             | 2'-5'-oligoadenylate synthetase 3, 100kDa (OAS3), mRNA.                                               | 1463<br>481 | 218400_<br>at     |
| -1.25125   | GPR137B          | G protein-coupled receptor 137B (GPR137B), mRNA.                                                      | 1456<br>039 | 204137_<br>at     |
| -1.2459125 | GRN              | granulin (GRN), mRNA.                                                                                 | 1499<br>116 | 216041_<br>x_at   |
| -1.2318875 |                  | CDNA FLJ41339 fis, clone BRASW1000053                                                                 | 1476<br>553 | 236099_<br>at     |
| -1.224075  | BAIAP2-<br>AS1   | BAIAP2 antisense RNA 1 (head to head) (BAIAP2-AS1), long non-coding RNA.                              | 1507<br>422 | 1558147_<br>_a_at |
| -1.2225375 | YME1L1           | YME1-like 1 ( <i>S. cerevisiae</i> )                                                                  | 1460<br>869 | 213830_<br>at     |
| -1.2214125 | CCND2            | cyclin D2 (CCND2), mRNA.                                                                              | 1491<br>737 | 200951_<br>s_at   |
| -1.21685   | LIME1            | Lck interacting transmembrane adaptor 1 (LIME1), mRNA.                                                | 1464<br>161 | 219541_<br>at     |
| -1.210875  | ANKRD4<br>4      | ankyrin repeat domain 44 (ANKRD44), transcript variant B, mRNA.                                       | 1476<br>258 | 235777_<br>at     |
| -1.2103125 |                  | CDNA FLJ36989 fis, clone BRACE2006753                                                                 | 1487<br>354 | 1559776_<br>_at   |
| -1.21025   | HIST1H2<br>BK    | histone cluster 1, H2bk (HIST1H2BK), mRNA.                                                            | 1458<br>977 | 209806_<br>at     |
| -1.207325  | LOC10013<br>1043 | Uncharacterized LOC100131043                                                                          | 1483<br>604 | 244029_<br>at     |
| -1.2053125 | WARS             | tryptophanyl-tRNA synthetase (WARS), transcript variant 1, mRNA.                                      | 1454<br>507 | 200629_<br>at     |
| -1.205025  | GRN              | granulin (GRN), mRNA.                                                                                 | 1491<br>550 | 200678_<br>x_at   |
| -1.2034375 |                  | Transcribed locus                                                                                     | 1489<br>884 | 1565894_<br>_at   |
| -1.2014875 | APOBEC3          | apolipoprotein B mRNA editing enzyme, catalytic polypeptide-like 3G (APOBEC3G), mRNA.                 | 1456<br>075 | 204205_<br>at     |

## G

|            |           |                                                                                                                                |      |         |
|------------|-----------|--------------------------------------------------------------------------------------------------------------------------------|------|---------|
| -1.2012    | TRAF4     | TNF receptor-associated factor 4 (TRAF4), mRNA.                                                                                | 1497 | 211899_ |
| -1.196925  | PHEX      | phosphate regulating endopeptidase homolog, X-linked (PHEX), transcript variant 1, mRNA.                                       | 551  | s_at    |
| -1.19305   | IL27RA    | Interleukin 27 receptor, alpha                                                                                                 | 1479 | 239229_ |
| -1.1917125 | LINC00173 | long intergenic non-protein coding RNA 173 (LINC00173), transcript variant 1, long non-coding RNA.                             | 384  | at      |
| -1.1883375 | SUSD1     | sushi domain containing 1 (SUSD1), transcript variant 2, mRNA.                                                                 | 1465 | 222062_ |
| -1.1879    | POM121L9P | POM121 transmembrane nucleoporin-like 9, pseudogene (POM121L9P), non-coding RNA.                                               | 621  | at      |
| -1.184175  | GNG8      | guanine nucleotide binding protein (G protein), gamma 8 (GNG8), mRNA.                                                          | 1477 | 237591_ |
| -1.1820125 | FCRL5     | Fc receptor-like 5                                                                                                             | 929  | at      |
| -1.1815875 | LY96      | lymphocyte antigen 96 (LY96), transcript variant 1, mRNA.                                                                      | 1468 | 226264_ |
| -1.1788375 | CHDH      | choline dehydrogenase (CHDH), mRNA.                                                                                            | 285  | at      |
| -1.17425   | KIF15     | kinesin family member 15 (KIF15), mRNA.                                                                                        | 1504 | 232736_ |
| -1.17025   | SASH3     | SAM and SH3 domain containing 3 (SASH3), mRNA.                                                                                 | 171  | s_at    |
| -1.1694    | LILRB4    | leukocyte immunoglobulin-like receptor, subfamily B (with TM and ITIM domains), member 4 (LILRB4), transcript variant 1, mRNA. | 1475 | 234284_ |
| -1.1682875 | HN1       | hematological and neurological expressed 1 (HN1), transcript variant 1, mRNA.                                                  | 019  | at      |
| -1.16585   | OGT       | O-linked N-acetylglucosamine (GlcNAc) transferase (OGT), transcript variant 1, mRNA.                                           | 1502 | 224404_ |
| -1.1649    | TNNI2     | troponin I type 2 (skeletal, fast) (TNNI2), transcript variant 1, mRNA.                                                        | 795  | s_at    |
| -1.16265   | ABRACL    | ABRA C-terminal like (ABRACL), mRNA.                                                                                           | 1457 | 206584_ |
| -1.1624375 |           | Full length insert cDNA clone YI46G04                                                                                          | 467  | at      |
| -1.1616    | GSN       | gelsolin (GSN), transcript variant 1, mRNA.                                                                                    | 1487 | 1559590 |
| -1.1609875 | ZBP1      | Z-DNA binding protein 1 (ZBP1), transcript variant 1, mRNA.                                                                    | 269  | _at     |
| -1.1584125 | PLEKHA7   | pleckstrin homology domain containing, family A member 7 (PLEKHA7), mRNA.                                                      | 1464 | 219306_ |
| -1.1558625 | SFTPB     | surfactant protein B (SFTPB), transcript variant 1, mRNA.                                                                      | 004  | at      |
| -1.1491    | IL17RB    | interleukin 17 receptor B (IL17RB), mRNA.                                                                                      | 1456 | 204923_ |
| -1.1451625 | RASGRF1   | Ras protein-specific guanine nucleotide-releasing factor 1 (RASGRF1), transcript variant 1, mRNA.                              | 451  | at      |
| -1.1441375 | GLIPR2    | GLI pathogenesis-related 2 (GLIPR2), transcript variant 1, mRNA.                                                               | 1459 | 210152_ |
| -1.14315   | UBE2E2    | ubiquitin-conjugating enzyme E2E 2 (UBE2E2), mRNA.                                                                             | 124  | at      |
| -1.1412375 | IGFLR1    | IGF-like family receptor 1 (IGFLR1), mRNA.                                                                                     | 1465 | 222396_ |
| -1.1331875 |           | Transcribed locus                                                                                                              | 805  | at      |
| -1.1282875 | OGT       | O-linked N-acetylglucosamine (GlcNAc) transferase (OGT), transcript variant 1, mRNA.                                           | 1497 | 212307_ |
| -1.1252375 | TRAF4     | TNF receptor-associated factor 4 (TRAF4), mRNA.                                                                                | 716  | s_at    |
| -1.1244    | LILRA2    | leukocyte immunoglobulin-like receptor, subfamily A (with TM domain), member 2 (LILRA2), transcript variant 1, mRNA.           | 1457 | 206393_ |
| -1.1237125 | EFCAB4A   | PREDICTED: EF-hand calcium binding domain 4A (EFCAB4A), transcript variant X1, mRNA.                                           | 359  | at      |
| -1.12335   |           | Transcribed locus, strongly similar to NP_078795.2 FAM65A gene product [Homo sapiens]                                          | 1466 | 223361_ |
|            |           |                                                                                                                                | 247  | at      |
|            |           |                                                                                                                                | 1469 | 227952_ |
|            |           |                                                                                                                                | 754  | at      |
|            |           |                                                                                                                                | 1491 | 200696_ |
|            |           |                                                                                                                                | 562  | s_at    |
|            |           |                                                                                                                                | 1505 | 242020_ |
|            |           |                                                                                                                                | 355  | s_at    |
|            |           |                                                                                                                                | 1470 | 228450_ |
|            |           |                                                                                                                                | 163  | at      |
|            |           |                                                                                                                                | 1458 | 209810_ |
|            |           |                                                                                                                                | 978  | at      |
|            |           |                                                                                                                                | 1502 | 224361_ |
|            |           |                                                                                                                                | 768  | s_at    |
|            |           |                                                                                                                                | 1496 | 210550_ |
|            |           |                                                                                                                                | 583  | s_at    |
|            |           |                                                                                                                                | 1503 | 225604_ |
|            |           |                                                                                                                                | 091  | s_at    |
|            |           |                                                                                                                                | 1467 | 225651_ |
|            |           |                                                                                                                                | 760  | at      |
|            |           |                                                                                                                                | 1464 | 219690_ |
|            |           |                                                                                                                                | 263  | at      |
|            |           |                                                                                                                                | 1503 | 231597_ |
|            |           |                                                                                                                                | 977  | x_at    |
|            |           |                                                                                                                                | 1494 | 207563_ |
|            |           |                                                                                                                                | 897  | s_at    |
|            |           |                                                                                                                                | 1482 | 242473_ |
|            |           |                                                                                                                                | 245  | at      |
|            |           |                                                                                                                                | 1496 | 211100_ |
|            |           |                                                                                                                                | 958  | x_at    |
|            |           |                                                                                                                                | 1469 | 227429_ |
|            |           |                                                                                                                                | 303  | at      |
|            |           |                                                                                                                                | 1503 | 230980_ |
|            |           |                                                                                                                                | 896  | x_at    |

|            |          |                                                                                                                         |      |         |
|------------|----------|-------------------------------------------------------------------------------------------------------------------------|------|---------|
| -1.1215375 | S100A4   | S100 calcium binding protein A4 (S100A4), transcript variant 1, mRNA.                                                   | 1493 | 203186_ |
|            |          |                                                                                                                         | 020  | s_at    |
| -1.118425  | ZDHHC12  | zinc finger, DHHC-type containing 12 (ZDHHC12), mRNA.                                                                   | 1468 | 226088_ |
|            |          |                                                                                                                         | 139  | at      |
| -1.1181125 | CBR1     | carbonyl reductase 1 (CBR1), transcript variant 1, mRNA.                                                                | 1458 | 209213_ |
|            |          |                                                                                                                         | 694  | at      |
| -1.1146    | MT1HL1   | metallothionein 1H-like 1 (MT1HL1), mRNA.                                                                               | 1497 | 211456_ |
|            |          |                                                                                                                         | 197  | x_at    |
| -1.113625  | TREX1    | three prime repair exonuclease 1 (TREX1), transcript variant 5, mRNA.                                                   | 1494 | 205875_ |
|            |          |                                                                                                                         | 250  | s_at    |
| -1.1133625 | FAM129C  | PREDICTED: family with sequence similarity 129, member C (FAM129C), transcript variant X4, misc_RNA.                    | 1472 | 230983_ |
|            |          |                                                                                                                         | 292  | at      |
| -1.1105375 | DUS2     | dihydrouridine synthase 2 (DUS2), transcript variant 1, mRNA.                                                           | 1464 | 219486_ |
|            |          |                                                                                                                         | 124  | at      |
| -1.110425  | GEM      | GTP binding protein overexpressed in skeletal muscle (GEM), transcript variant 1, mRNA.                                 | 1456 | 204472_ |
|            |          |                                                                                                                         | 209  | at      |
| -1.10985   | BACE2    | beta-site APP-cleaving enzyme 2 (BACE2), transcript variant a, mRNA.                                                    | 1499 | 217867_ |
|            |          |                                                                                                                         | 888  | x_at    |
| -1.1082    | ADA      | adenosine deaminase (ADA), mRNA.                                                                                        | 1499 | 216705_ |
|            |          |                                                                                                                         | 388  | s_at    |
| -1.1077625 | CD82     | CD82 molecule (CD82), transcript variant 1, mRNA.                                                                       | 1493 | 203904_ |
|            |          |                                                                                                                         | 392  | x_at    |
| -1.1056125 | ISG15    | ISG15 ubiquitin-like modifier (ISG15), mRNA.                                                                            | 1494 | 205483_ |
|            |          |                                                                                                                         | 101  | s_at    |
| -1.1032    | SULF2    | sulfatase 2 (SULF2), transcript variant 1, mRNA.                                                                        | 1466 | 224724_ |
|            |          |                                                                                                                         | 989  | at      |
| -1.103025  | UTS2     | urotensin 2 (UTS2), transcript variant 2, mRNA.                                                                         | 1501 | 220784_ |
|            |          |                                                                                                                         | 012  | s_at    |
| -1.10025   |          | Transcribed locus, strongly similar to XP_003953345.1 PREDICTED: uncharacterized protein LOC101058300 [Pan troglodytes] | 1472 | 231356_ |
|            |          |                                                                                                                         | 612  | at      |
| -1.0970375 | ADAP2    | ArfGAP with dual PH domains 2 (ADAP2), mRNA.                                                                            | 1500 | 219358_ |
|            |          |                                                                                                                         | 560  | s_at    |
| -1.0963375 | SRD5A1   | steroid-5-alpha-reductase, alpha polypeptide 1 (3-oxo-5 alpha-steroid delta 4-dehydrogenase alpha 1) (SRD5A1), mRNA.    | 1496 | 210959_ |
|            |          |                                                                                                                         | 844  | s_at    |
| -1.0947875 |          | Transcribed locus                                                                                                       | 1482 | 242947_ |
|            |          |                                                                                                                         | 643  | at      |
| -1.0939625 | C1orf85  | chromosome 1 open reading frame 85 (C1orf85), transcript variant 1, mRNA.                                               | 1507 | 1558693 |
|            |          |                                                                                                                         | 518  | _s_at   |
| -1.091425  | WARS     | tryptophanyl-tRNA synthetase (WARS), transcript variant 1, mRNA.                                                        | 1491 | 200628_ |
|            |          |                                                                                                                         | 521  | s_at    |
| -1.091075  | CYB561A3 | cytochrome b561 family, member A3 (CYB561A3), transcript variant 2, mRNA.                                               | 1466 | 224735_ |
|            |          |                                                                                                                         | 999  | at      |
| -1.0904375 | TP63     | tumor protein p63 (TP63), transcript variant 1, mRNA.                                                                   | 1496 | 209863_ |
|            |          |                                                                                                                         | 222  | s_at    |
| -1.0863625 | LDHA     | lactate dehydrogenase A (LDHA), transcript variant 1, mRNA.                                                             | 1491 | 200650_ |
|            |          |                                                                                                                         | 534  | s_at    |
| -1.0860125 |          | CDNA FLJ12909 fis, clone NT2RP2004400                                                                                   | 1472 | 230650_ |
|            |          |                                                                                                                         | 006  | at      |
| -1.0818375 |          | Transcribed locus                                                                                                       | 1478 | 238183_ |
|            |          |                                                                                                                         | 460  | at      |
| -1.0784    | AGMAT    | agmatine ureohydrolase (agmatinase) (AGMAT), mRNA.                                                                      | 1502 | 222930_ |
|            |          |                                                                                                                         | 125  | s_at    |
| -1.0773375 | ITGB7    | integrin, beta 7 (ITGB7), transcript variant 1, mRNA.                                                                   | 1456 | 205718_ |
|            |          |                                                                                                                         | 925  | at      |
| -1.0771125 | EVI2A    | ecotropic viral integration site 2A (EVI2A), transcript variant 2, mRNA.                                                | 1456 | 204774_ |
|            |          |                                                                                                                         | 378  | at      |
| -1.0758375 | EHD3     | EH-domain containing 3 (EHD3), mRNA.                                                                                    | 1463 | 218935_ |
|            |          |                                                                                                                         | 780  | at      |
| -1.075625  | HMOX1    | heme oxygenase (decycling) 1 (HMOX1), mRNA.                                                                             | 1455 | 203665_ |
|            |          |                                                                                                                         | 791  | at      |
| -1.0737625 | DUSP2    | dual specificity phosphatase 2 (DUSP2), mRNA.                                                                           | 1456 | 204794_ |
|            |          |                                                                                                                         | 388  | at      |
| -1.072575  |          | Transcribed locus                                                                                                       | 1483 | 243489_ |
|            |          |                                                                                                                         | 125  | at      |
| -1.07155   | TLR6     | toll-like receptor 6 (TLR6), mRNA.                                                                                      | 1457 | 207446_ |
|            |          |                                                                                                                         | 996  | at      |
| -1.0712875 | BATF     | basic leucine zipper transcription factor, ATF-like (BATF), mRNA.                                                       | 1457 | 205965_ |
|            |          |                                                                                                                         | 081  | at      |

|            |           |                                                                                                                                  |             |          |
|------------|-----------|----------------------------------------------------------------------------------------------------------------------------------|-------------|----------|
| -1.0696125 | CACNA1D   | calcium channel, voltage-dependent, L type, alpha 1D subunit (CACNA1D), transcript variant 1, mRNA.                              | 1459<br>102 | 210108_  |
| -1.0683375 | CDK2AP1   | cyclin-dependent kinase 2 associated protein 1 (CDK2AP1), transcript variant 1, mRNA.                                            | 1455<br>008 | 201938_  |
| -1.066     | MRPS25    | mitochondrial ribosomal protein S25 (MRPS25), mRNA.                                                                              | 1502<br>975 | 224869_  |
| -1.0648    | KEAP1     | kelch-like ECH-associated protein 1 (KEAP1), transcript variant 2, mRNA.                                                         | 1455<br>214 | 202417_  |
| -1.0627    | LOC400958 | uncharacterized LOC400958 (LOC400958), long non-coding RNA.                                                                      | 1491<br>072 | 1570006_ |
| -1.0595375 | ARPC1B    | actin related protein 2/3 complex, subunit 1B, 41kDa (ARPC1B), mRNA.                                                             | 1455<br>018 | 201954_  |
| -1.05795   | FAM46C    | family with sequence similarity 46, member C (FAM46C), mRNA.                                                                     | 1464<br>683 | 220306_  |
| -1.0566375 | FGD2      | FYVE, RhoGEF and PH domain containing 2 (FGD2), mRNA.                                                                            | 1506<br>190 | 1553906_ |
| -1.054025  | LILRA6    | PREDICTED: leukocyte immunoglobulin-like receptor, subfamily A (with TM domain), member 6 (LILRA6), transcript variant X1, mRNA. | 1495<br>481 | 208594_  |
| -1.053525  | GPSM1     | G-protein signaling modulator 1 (GPSM1), transcript variant 1, mRNA.                                                             | 1468<br>099 | 226043_  |
| -1.049025  | GGCX      | Gamma-glutamyl carboxylase                                                                                                       | 1460<br>957 | 214005_  |
| -1.0477625 | SYTL1     | synaptotagmin-like 1 (SYTL1), transcript variant 2, mRNA.                                                                        | 1469<br>055 | 227134_  |
| -1.0454625 | BCAR3     | breast cancer anti-estrogen resistance 3 (BCAR3), transcript variant 2, mRNA.                                                    | 1455<br>975 | 204032_  |
| -1.043625  | SFTPB     | surfactant protein B (SFTPB), transcript variant 1, mRNA.                                                                        | 1454<br>143 | 37004_a  |
| -1.0436125 | FCRL5     | Fc receptor-like 5                                                                                                               | 1466<br>824 | 224405_  |
| -1.043175  | IRF5      | interferon regulatory factor 5 (IRF5), transcript variant 2, mRNA.                                                               | 1479<br>560 | 239412_  |
| -1.040825  | ANXA4     | annexin A4 (ANXA4), mRNA.                                                                                                        | 1491<br>954 | 201301_  |
| -1.04065   | ZNF836    | zinc finger protein 836 (ZNF836), mRNA.                                                                                          | 1508<br>447 | 1569076_ |
| -1.040025  | MST1      | macrophage stimulating 1 (hepatocyte growth factor-like) (MST1), mRNA.                                                           | 1494<br>174 | 205614_  |
| -1.0397625 | DLEU1     | deleted in lymphocytic leukemia 1 (non-protein coding) (DLEU1), transcript variant 2, long non-coding RNA.                       | 1494<br>174 | 205677_  |
| -1.0379625 | C17orf49  | chromosome 17 open reading frame 49 (C17orf49), transcript variant 2, mRNA.                                                      | 1466<br>871 | 224574_  |
| -1.0372375 | NAPRT1    | nicotinate phosphoribosyltransferase domain containing 1 (NAPRT1), transcript variant 1, mRNA.                                   | 1468<br>675 | 226707_  |
| -1.036825  | APOBEC3G  | apolipoprotein B mRNA editing enzyme, catalytic polypeptide-like 3G (APOBEC3G), mRNA.                                            | 1498<br>728 | 214995_  |
| -1.0356625 | OAS1      | 2'-5'-oligoadenylate synthetase 1, 40/46kDa (OAS1), transcript variant 2, mRNA.                                                  | 1494<br>130 | 205552_  |
| -1.035175  | DUS2      | dihydrouridine synthase 2 (DUS2), transcript variant 1, mRNA.                                                                    | 1454<br>289 | 47105_a  |
| -1.033625  | C3orf14   | chromosome 3 open reading frame 14 (C3orf14), transcript variant 1, mRNA.                                                        | 1463<br>994 | 219288_  |
| -1.0331875 | UGT2B17   | UDP glucuronosyltransferase 2 family, polypeptide B17 (UGT2B17), mRNA.                                                           | 1457<br>880 | 207245_  |
| -1.0322    | DSCR3     | Down syndrome critical region gene 3 (DSCR3), mRNA.                                                                              | 1499<br>653 | 217309_  |
| -1.029775  | HES6      | hes family bHLH transcription factor 6 (HES6), transcript variant 1, mRNA.                                                       | 1468<br>446 | 226446_  |
| -1.0257875 | KDM4B     | lysine (K)-specific demethylase 4B (KDM4B), mRNA.                                                                                | 1497<br>758 | 212492_  |
| -1.0253625 | TYMS      | thymidylate synthetase (TYMS), mRNA.                                                                                             | 1455<br>278 | 202589_  |
| -1.0252625 | PHACTR1   | PREDICTED: phosphatase and actin regulator 1 (PHACTR1), transcript variant X1, mRNA.                                             | 1503<br>200 | 226397_  |
| -1.0242125 | BLMH      | bleomycin hydrolase (BLMH), mRNA.                                                                                                | 1455<br>108 | 202179_  |

|            |                  |                                                                                                                            |             |                 |
|------------|------------------|----------------------------------------------------------------------------------------------------------------------------|-------------|-----------------|
| -1.0231875 | NLRP4            | NLR family, pyrin domain containing 4 (NLRP4), mRNA.                                                                       | 1482<br>131 | 242334_<br>at   |
| -1.02315   | ZC3HAV1<br>L     | Zinc finger CCCH-type, antiviral 1-like                                                                                    | 1470<br>018 | 228280_<br>at   |
| -1.0227625 | NPM3             | nucleophosmin/nucleoplasmin 3 (NPM3), mRNA.                                                                                | 1456<br>571 | 205129_<br>at   |
| -1.0223625 | POM121L<br>8P    | POM121 transmembrane nucleoporin-like 8 pseudogene (POM121L8P), non-coding RNA.                                            | 1486<br>534 | 1557633_<br>_at |
| -1.0198625 | COCH             | cochlin (COCH), transcript variant 2, mRNA.                                                                                | 1493<br>997 | 205229_<br>s_at |
| -1.0193125 | IL27RA           | interleukin 27 receptor, alpha (IL27RA), mRNA.                                                                             | 1457<br>055 | 205926_<br>at   |
| -1.018725  | LOC10272<br>4614 | PREDICTED: uncharacterized LOC102724614 (LOC102724614), mRNA.                                                              | 1504<br>846 | 237367_<br>x_at |
| -1.0186875 | GPX1             | glutathione peroxidase 1 (GPX1), transcript variant 1, mRNA.                                                               | 1491<br>588 | 200736_<br>s_at |
| -1.014225  | GM2A             | GM2 ganglioside activator (GM2A), transcript variant 1, mRNA.                                                              | 1458<br>937 | 209727_<br>at   |
| -1.0105875 | SRGN             | serglycin (SRGN), transcript variant 1, mRNA.                                                                              | 1492<br>283 | 201858_<br>s_at |
| -1.0101    | BZRAP1-<br>AS1   | BZRAP1 antisense RNA 1 (BZRAP1-AS1), transcript variant 1, long non-coding RNA.                                            | 1470<br>484 | 228828_<br>at   |
| -1.007575  | RHOF             | ras homolog family member F (in filopodia) (RHOF), mRNA.                                                                   | 1502<br>060 | 222812_<br>s_at |
| -1.0067125 | SNHG20           | small nucleolar RNA host gene 20 (non-protein coding) (SNHG20), long non-coding RNA.                                       | 1465<br>391 | 221621_<br>at   |
| -1.006625  | NCR3             | natural cytotoxicity triggering receptor 3 (NCR3), transcript variant 1, mRNA.                                             | 1496<br>887 | 211010_<br>s_at |
| -1.0060625 | GUCY2C           | guanylate cyclase 2C (heat stable enterotoxin receptor) (GUCY2C), mRNA.                                                    | 1457<br>306 | 206312_<br>at   |
| -1.0057375 | SLC25A1<br>9     | solute carrier family 25 (mitochondrial thiamine pyrophosphate carrier), member 19 (SLC25A19), transcript variant 2, mRNA. | 1466<br>171 | 223222_<br>at   |
| -1.0022625 | ATP6V1D          | ATPase, H <sup>+</sup> transporting, lysosomal 34kDa, V1 subunit D (ATP6V1D), mRNA.                                        | 1458<br>581 | 208898_<br>at   |
| -1.0021375 | TOP2A            | topoisomerase (DNA) II alpha 170kDa (TOP2A), mRNA.                                                                         | 1454<br>746 | 201292_<br>at   |
| -1.0018375 | LINC0015<br>2    | long intergenic non-protein coding RNA 152 (LINC00152), transcript variant 1, long non-coding RNA.                         | 1467<br>888 | 225799_<br>at   |
| -1.0015125 | IL13RA1          | interleukin 13 receptor, alpha 1 (IL13RA1), mRNA.                                                                          | 1454<br>986 | 201887_<br>at   |

**Tables S5: Most down-regulated genes after 28 days of treatment with ibrutinib plus rituximab.**

| log2 fold GE<br>change | Gene    | Description                                                                               | Well<br>ID  | Feature ID      |
|------------------------|---------|-------------------------------------------------------------------------------------------|-------------|-----------------|
| 1.2921125              | TCAP    | titin-cap (TCAP), mRNA.                                                                   | 145695<br>2 | 205766_at       |
| 1.2387375              |         | Transcribed locus                                                                         | 148312<br>5 | 243489_at       |
| 1.1882375              | IDH3G   | isocitrate dehydrogenase 3 (NAD <sup>+</sup> ) gamma (IDH3G), transcript variant 2, mRNA. | 149846<br>9 | 214333_x_<br>at |
| 1.181425               |         | Transcribed locus                                                                         | 150397<br>7 | 231597_x_<br>at |
| 1.12865                | TLN1    | Talin 1                                                                                   | 147379<br>2 | 232763_at       |
| 1.0952                 | SLC16A6 | solute carrier family 16, member 6 (SLC16A6), transcript variant 2, mRNA.                 | 145776<br>1 | 207038_at       |
| 1.09375                | TCL1B   | T-cell leukemia/lymphoma 1B (TCL1B), mRNA.                                                | 149444<br>0 | 206413_s_a<br>t |

|           |           |                                                                                       |             |              |
|-----------|-----------|---------------------------------------------------------------------------------------|-------------|--------------|
| 1.06955   | DOCK9-AS2 | DOCK9 antisense RNA 2 (head to head) (DOCK9-AS2), long non-coding RNA.                | 147235<br>8 | 231062_at    |
| 1.06605   |           | CDNA FLJ36012 fis, clone TESTI2015987                                                 | 148989<br>4 | 1565909_at   |
| 1.06185   | AVIL      | Advillin                                                                              | 150838<br>9 | 1568706_s_at |
| 1.0504875 |           | CDNA FLJ13776 fis, clone PLACE4000387                                                 | 146163<br>8 | 215197_at    |
| 1.04545   | BRWD1     | bromodomain and WD repeat domain containing 1 (BRWD1), transcript variant 2, mRNA.    | 147302<br>4 | 231860_at    |
| 1.0314625 |           | Transcribed locus                                                                     | 148318<br>2 | 243554_at    |
| 1.01985   |           | Transcribed locus                                                                     | 147775<br>3 | 237400_at    |
| 1.0167875 | MTURN     | maturin, neural progenitor differentiation regulator homolog (Xenopus) (MTURN), mRNA. | 146807<br>7 | 226018_at    |
| 1.0123    | ENDOU     | endonuclease, polyU-specific (ENDOU), transcript variant 2, mRNA.                     | 145748<br>1 | 206605_at    |
| 1.0086125 | POU6F1    | POU class 6 homeobox 1 (POU6F1), transcript variant 1, mRNA.                          | 147129<br>4 | 229809_at    |
| 1.0034    |           | Transcribed locus                                                                     | 148375<br>9 | 244202_at    |
| 1.0013625 |           | Transcribed locus                                                                     | 148178<br>7 | 241928_at    |
| 1.0000875 |           |                                                                                       | 150289<br>8 | 224549_x_at  |

**Tables S6: Most up-regulated genes after 7 days of treatment with ibrutinib plus rituximab.**



| log2 fold GE change | Gene         | Description                                                                                                | Well ID | Feature ID |
|---------------------|--------------|------------------------------------------------------------------------------------------------------------|---------|------------|
| 2.3756625           | C10orf10     | chromosome 10 open reading frame 10 (C10orf10), mRNA.                                                      | 14958   | 209183_s   |
|                     |              |                                                                                                            | 68      | _at        |
| 1.4567125           | SNX2         | sorting nexin 2 (SNX2), transcript variant 1, mRNA.                                                        | 14731   | 232049_a   |
|                     |              |                                                                                                            | 89      | t          |
| 1.4441625           | NPTX1        | neuronal pentraxin I (NPTX1), mRNA.                                                                        | 14563   | 204684_a   |
|                     |              |                                                                                                            | 34      | t          |
| 1.4032375           |              | Transcribed locus                                                                                          | 14817   | 241928_a   |
|                     |              |                                                                                                            | 87      | t          |
| 1.37395             | LOC100128751 | INM04                                                                                                      | 14736   | 232623_a   |
|                     |              |                                                                                                            | 75      | t          |
| 1.3727625           | SGSM1        | small G protein signaling modulator 1 (SGSM1), transcript variant 2, mRNA.                                 | 14717   | 230287_a   |
|                     |              |                                                                                                            | 00      | t          |
| 1.33075             | LOC100287598 | Uncharacterized LOC100287598                                                                               | 14767   | 236260_a   |
|                     |              |                                                                                                            | 01      | t          |
| 1.3270875           | ZC3H12B      | zinc finger CCCH-type containing 12B (ZC3H12B), mRNA.                                                      | 14708   | 229234_a   |
|                     |              |                                                                                                            | 19      | t          |
| 1.31485             | LOC550643    | Uncharacterized LOC550643                                                                                  | 14672   | 225028_a   |
|                     |              |                                                                                                            | 32      | t          |
| 1.310775            |              | CDNA: FLJ22606 fis, clone HSI04766                                                                         | 14752   | 234649_a   |
| 1.2982875           | FAM111B      | family with sequence similarity 111, member B (FAM111B), transcript variant 1, mRNA.                       | 15072   | 1557129_a  |
|                     |              |                                                                                                            | 19      | _at        |
| 1.2931125           | TLN1         | Talin 1                                                                                                    | 14737   | 232763_a   |
|                     |              |                                                                                                            | 92      | t          |
| 1.24635             |              | Transcribed locus                                                                                          | 14777   | 237400_a   |
|                     |              |                                                                                                            | 53      | t          |
| 1.2388875           | ZNF324       | zinc finger protein 324 (ZNF324), mRNA.                                                                    | 14939   | 205182_s   |
|                     | DOCK9-AS2    |                                                                                                            | 87      | _at        |
| 1.228925            |              | DOCK9 antisense RNA 2 (head to head) (DOCK9-AS2), long non-coding RNA.                                     | 14723   | 231062_a   |
|                     |              |                                                                                                            | 58      | t          |
| 1.2167875           | LOC101928403 | PREDICTED: uncharacterized LOC101928403 (LOC101928403), ncRNA.                                             | 14773   | 236990_a   |
|                     |              |                                                                                                            | 76      | t          |
| 1.2131              |              | Transcribed locus                                                                                          | 15054   | 242818_x   |
|                     |              |                                                                                                            | 86      | _at        |
| 1.2003375           | TAPT1        | transmembrane anterior posterior transformation 1 (TAPT1), mRNA.                                           | 14789   | 238798_a   |
|                     |              |                                                                                                            | 84      | t          |
| 1.1887125           |              | MRNA; cDNA DKFZp434C1427 (from clone DKFZp434C1427)                                                        | 14895   | 1564334_a  |
|                     |              |                                                                                                            | 01      | at         |
| 1.1755375           | TAPT1        | transmembrane anterior posterior transformation 1 (TAPT1), mRNA.                                           | 14692   | 227407_a   |
|                     |              |                                                                                                            | 85      | t          |
| 1.174125            | SMEK2        | SMEK homolog 2, suppressor of mek1 (Dictyostelium)                                                         | 14657   | 222270_a   |
|                     |              |                                                                                                            | 11      | t          |
| 1.16555             |              | Transcribed locus                                                                                          | 14761   | 235662_a   |
|                     |              |                                                                                                            | 52      | t          |
| 1.15615             |              | Transcribed locus                                                                                          | 14839   | 244373_a   |
|                     |              |                                                                                                            | 13      | t          |
| 1.155325            | SPRY2        | sprouty homolog 2 (Drosophila) (SPRY2), mRNA.                                                              | 14559   | 204011_a   |
|                     |              |                                                                                                            | 66      | t          |
| 1.1422875           |              | CDNA FLJ12367 fis, clone MAMMA1002413                                                                      | 14743   | 233440_a   |
|                     |              |                                                                                                            | 54      | t          |
| 1.1418875           | MATN1-AS1    | MATN1 antisense RNA 1 (MATN1-AS1), long non-coding RNA.                                                    | 14864   | 1557557_a  |
|                     |              |                                                                                                            | 95      | at         |
| 1.1404              | RIMKLB       | PREDICTED: ribosomal modification protein rimK-like family member B (RIMKLB), transcript variant X1, mRNA. | 15031   | 226164_x   |
|                     |              |                                                                                                            | 71      | _at        |
| 1.1357375           | ID3          | inhibitor of DNA binding 3, dominant negative helix-loop-helix protein (ID3), mRNA.                        | 14950   | 207826_s   |
|                     |              |                                                                                                            | 31      | _at        |
| 1.1319375           |              | Transcribed locus                                                                                          | 14799   | 239809_a   |
|                     |              |                                                                                                            | 17      | t          |
| 1.117475            | AVIL         | Advillin                                                                                                   | 15083   | 1568706_s  |
|                     |              |                                                                                                            | 89      | _at        |
| 1.1163125           | DERL3        | derlin 3 (DERL3), transcript variant 1, mRNA.                                                              | 14705   | 228897_a   |
|                     |              |                                                                                                            | 43      | t          |
| 1.1163125           |              | CDNA clone IMAGE:5267748                                                                                   | 14885   | 1562280_a  |
|                     |              |                                                                                                            | 66      | at         |

|           |          |                                                                                   |       |          |
|-----------|----------|-----------------------------------------------------------------------------------|-------|----------|
| 1.1045375 | ZBTB42   | zinc finger and BTB domain containing 42 (ZBTB42), mRNA.                          | 14711 | 229691_a |
|           |          |                                                                                   | 98    | t        |
| 1.0928    |          | Transcribed locus                                                                 | 14831 | 243554_a |
|           |          |                                                                                   | 82    | t        |
| 1.0869125 | CSNK1E   | casein kinase 1, epsilon (CSNK1E), transcript variant 2, mRNA.                    | 14551 | 202332_a |
|           |          |                                                                                   | 79    | t        |
| 1.0816375 |          | Transcribed locus                                                                 | 14787 | 238512_a |
|           |          |                                                                                   | 29    | t        |
| 1.0715625 | PRCD     | Progressive rod-cone degeneration                                                 | 14714 | 230015_a |
|           |          | family with sequence similarity 111, member B (FAM111B), transcript variant 1,    | 64    | t        |
| 1.0621625 | FAM111B  | mRNA.                                                                             | 14863 | 1557128_ |
|           |          |                                                                                   | 13    | at       |
| 1.05755   | DERL3    | derlin 3 (DERL3), transcript variant 2, mRNA.                                     | 15037 | 229721_x |
|           |          |                                                                                   | 01    | _at      |
| 1.0534375 | KLF7     | Kruppel-like factor 7 (ubiquitous) (KLF7), transcript variant 1, mRNA.            | 15051 | 240432_x |
|           |          |                                                                                   | 49    | _at      |
| 1.0529125 | SLC27A2  | solute carrier family 27 (fatty acid transporter), member 2 (SLC27A2), transcript | 14569 | 205769_a |
|           |          | variant 1, mRNA.                                                                  | 54    | t        |
| 1.049325  | ZNF629   | zinc finger protein 629 (ZNF629), mRNA.                                           | 14604 | 213196_a |
|           |          |                                                                                   | 77    | t        |
| 1.0418    | ZNF37BP  | zinc finger protein 37B, pseudogene (ZNF37BP), non-coding RNA.                    | 14988 | 215358_x |
|           | MATN1-   |                                                                                   | 49    | _at      |
| 1.040075  | AS1      | MATN1 antisense RNA 1 (MATN1-AS1), long non-coding RNA.                           | 15073 | 1557558_ |
|           |          |                                                                                   | 07    | s_at     |
| 1.040025  | KLF3     | Kruppel-like factor 3 (basic) (KLF3), mRNA.                                       | 14673 | 225133_a |
|           |          |                                                                                   | 26    | t        |
| 1.03835   | MAFF     | v-maf avian musculoaponeurotic fibrosarcoma oncogene homolog F (MAFF),            | 14541 |          |
|           |          | transcript variant 1, mRNA.                                                       | 33    | 36711_at |
| 1.0326625 | FLJ38717 | PREDICTED: FLJ38717 protein (FLJ38717), misc_RNA.                                 | 14874 | 1559964_ |
|           |          |                                                                                   | 21    | at       |
| 1.03055   | SMAD4    | SMAD family member 4                                                              | 14897 | 1565703_ |
|           |          |                                                                                   | 81    | at       |
| 1.0278625 | ZNF441   | zinc finger protein 441 (ZNF441), mRNA.                                           | 14847 | 1553192_ |
|           |          |                                                                                   | 49    | at       |
| 1.024475  |          | Transcribed locus                                                                 | 14713 | 229914_a |
|           |          |                                                                                   | 77    | t        |
| 1.0244625 | CSNK1E   | Casein kinase 1, epsilon                                                          | 14688 | 226858_a |
|           |          |                                                                                   | 08    | t        |
| 1.023175  | CD24     | CD24 molecule (CD24), transcript variant 1, mRNA.                                 | 14955 | 208651_x |
|           |          |                                                                                   | 23    | _at      |
| 1.0224875 |          | Transcribed locus                                                                 | 14768 | 236428_a |
|           |          | gamma-aminobutyric acid (GABA) A receptor, beta 2 (GABRB2), transcript variant    | 56    | t        |
| 1.020775  | GABRB2   | 2, mRNA.                                                                          | 15072 | 1557122_ |
|           |          |                                                                                   | 16    | s_at     |
| 1.0192625 | RNF38    | Ring finger protein 38                                                            | 14862 | 1556849_ |
|           |          |                                                                                   | 00    | at       |
| 1.017975  | MLXIP    | MLX interacting protein (MLXIP), mRNA.                                            | 14673 | 225157_a |
|           |          |                                                                                   | 49    | t        |
| 1.0150625 | DCAF8    | DDB1 and CUL4 associated factor 8                                                 | 14745 | 233637_a |
|           | THAP7-   |                                                                                   | 06    | t        |
| 1.011325  | AS1      | THAP7 antisense RNA 1 (THAP7-AS1), transcript variant 2, long non-coding RNA.     | 14791 | 239015_a |
|           |          |                                                                                   | 85    | t        |
| 1.0076125 | TMED4    | Transmembrane emp24 protein transport domain containing 4                         | 15074 | 1558053_ |
|           |          |                                                                                   | 07    | s_at     |
| 1.0072125 |          | CDNA clone IMAGE:6342029                                                          | 14787 | 238529_a |
|           |          |                                                                                   | 45    | t        |
| 1.002825  |          | Transcribed locus                                                                 | 14784 | 238192_a |
|           |          |                                                                                   | 69    | t        |
| 1.0004125 |          | CDNA clone IMAGE:3639730                                                          | 14864 | 1557539_ |
|           |          |                                                                                   | 84    | at       |
| 1.000025  | KANK2    | KN motif and ankyrin repeat domains 2 (KANK2), transcript variant 1, mRNA.        | 15001 | 218418_s |
|           |          |                                                                                   | 68    | _at      |

**Tables S7: Most up-regulated genes after 28 days of treatment with ibrutinib plus rituximab.**

**D. Supplemental Figures**

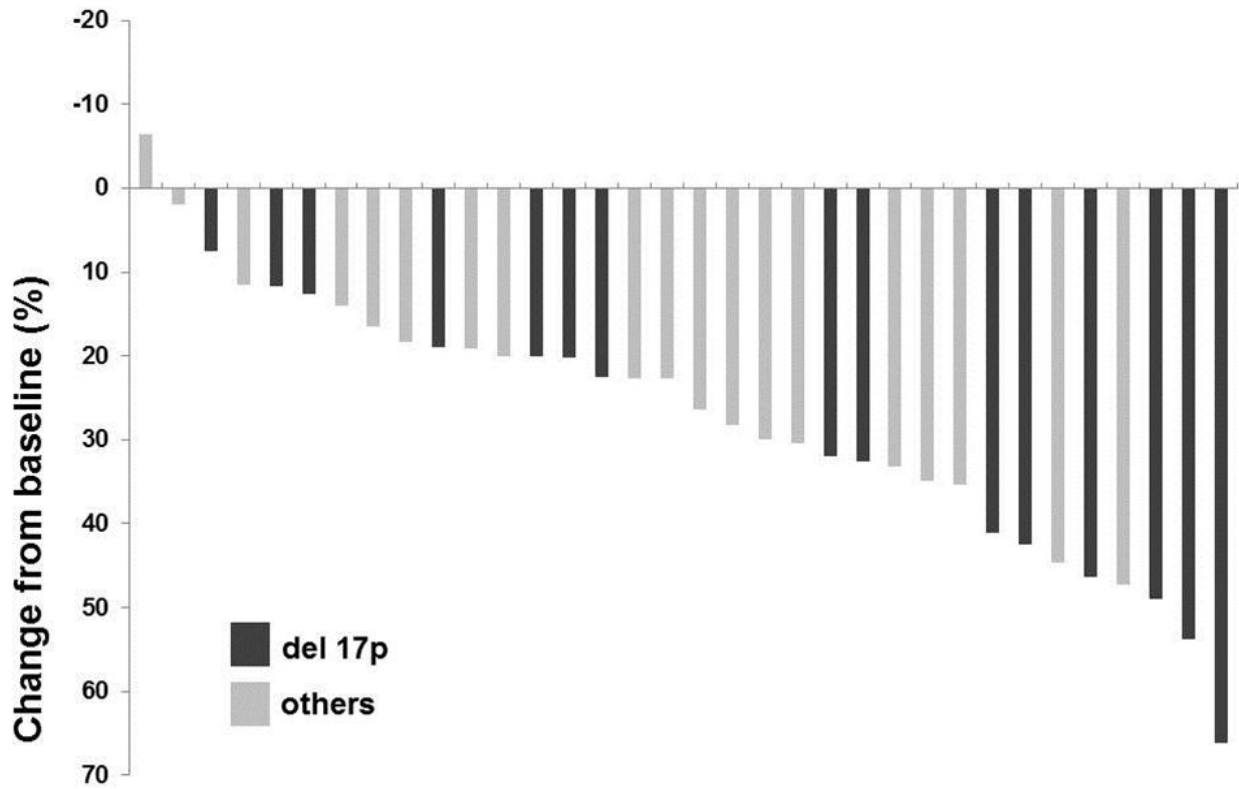

**Suppl. Figure S1** *Changes in spleen sizes during iR treatment.* CT scan assessment of spleen size at 12 months in 34 evaluable patients on iR therapy.

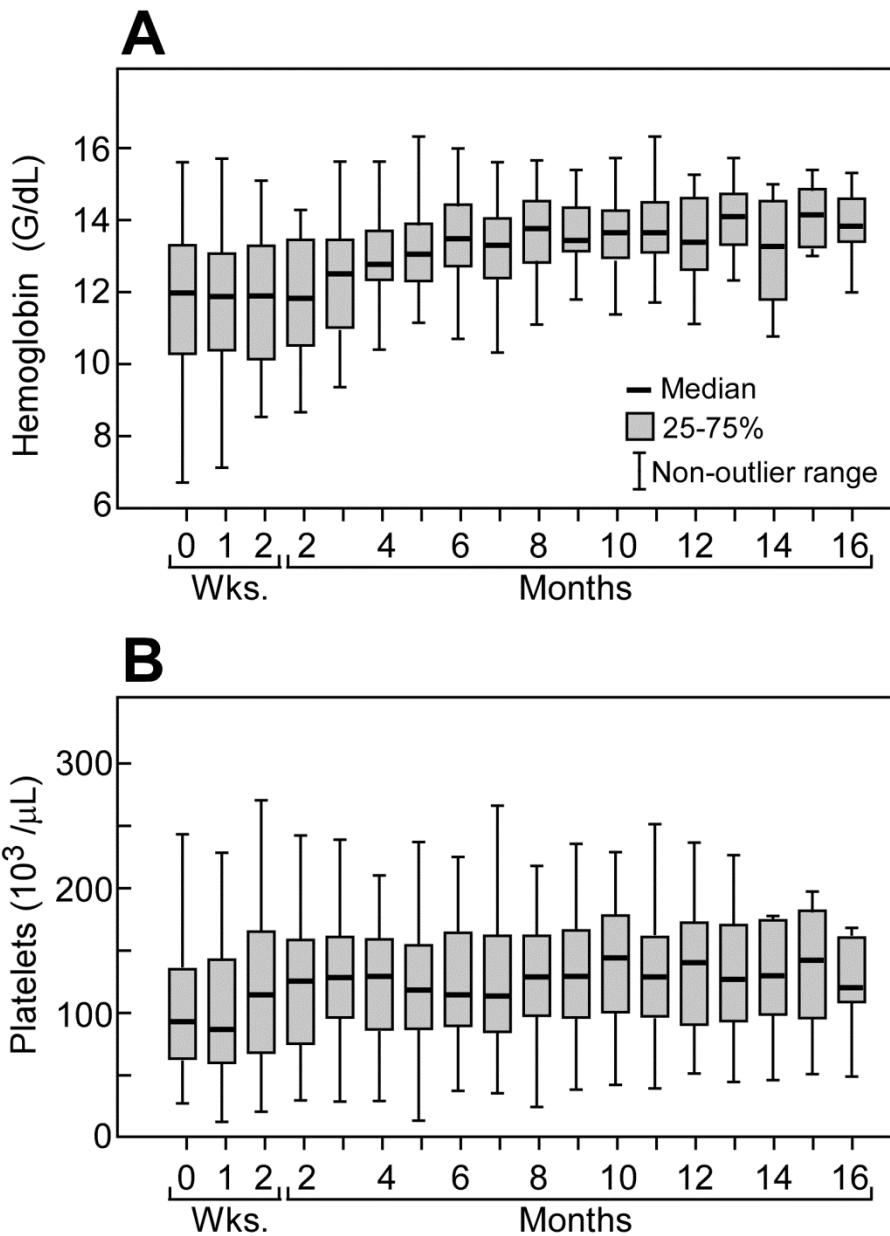

**Suppl. Figure S2** *Changes in haemoglobin levels and platelet counts during iR treatment.* Trended haemoglobin levels (A) and platelet counts (B) in CLL patients during therapy with ibrutinib and rituximab. The horizontal axis shows the time of treatment. The boxes in each of the graphs depict the range (25% to 75%) and the black lines indicate the median at each of the timepoints.

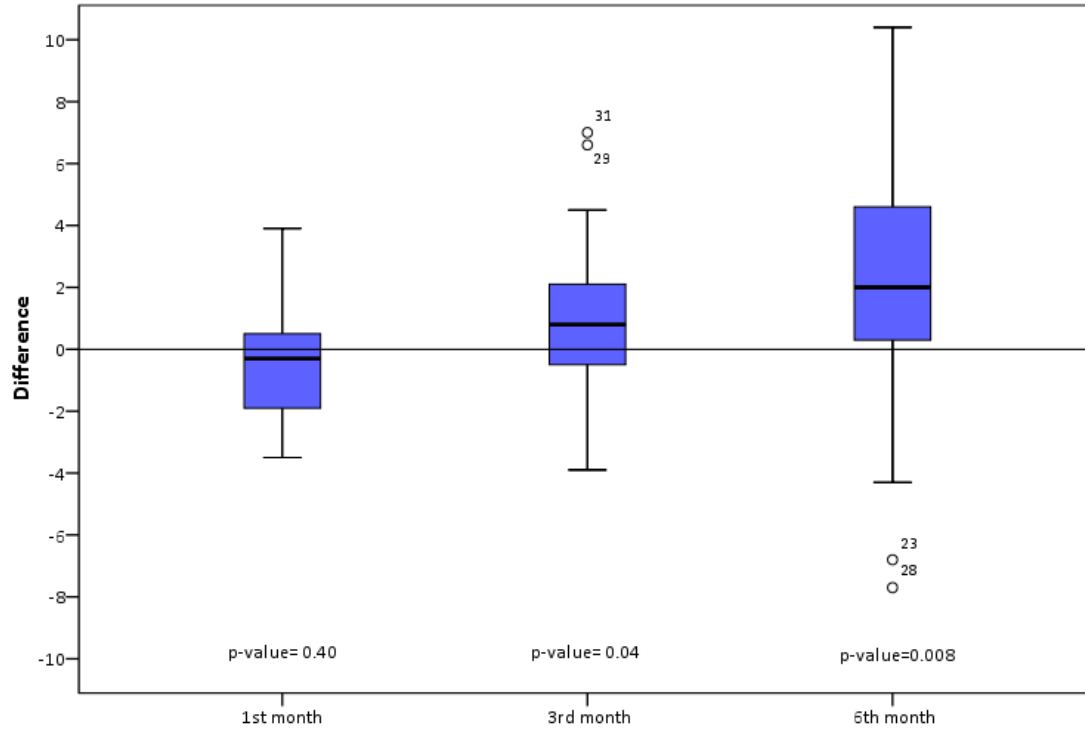

**Suppl. Figure S3:** Changes in weight during iR therapy.

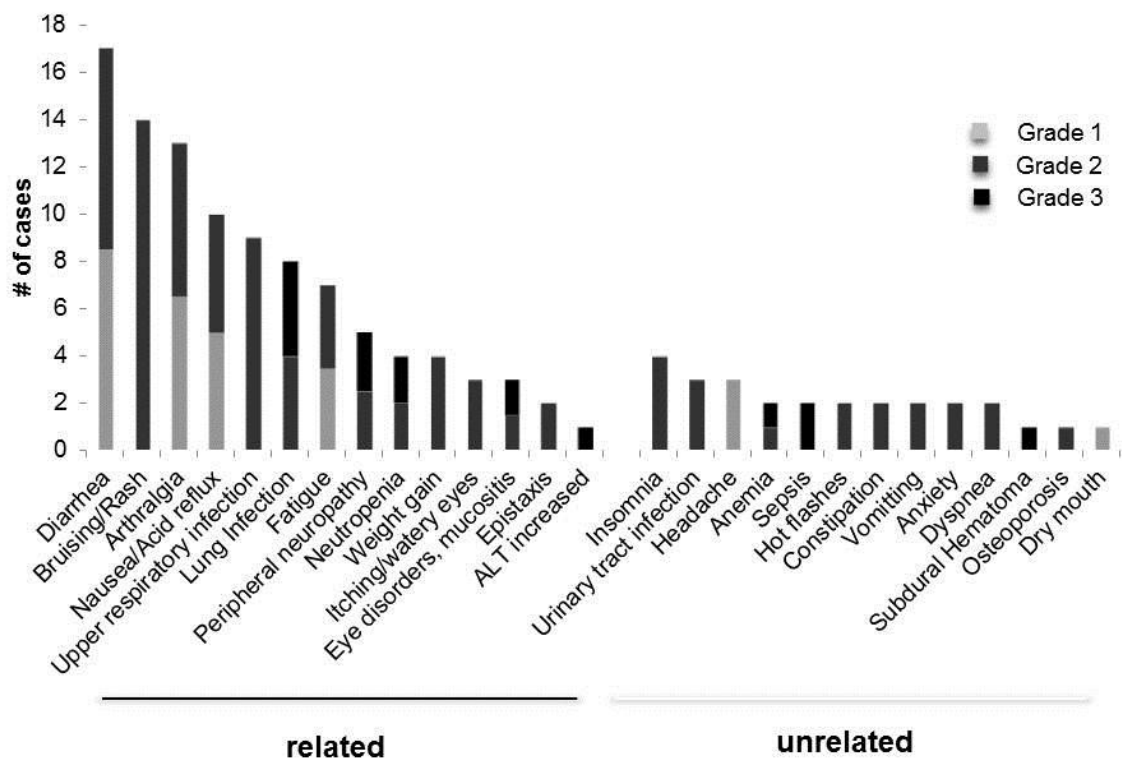

**Suppl. Figure S4 Related and unrelated toxicities during iR therapy.** The different grades of related (left hand side) and unrelated (right hand side) toxicities are indicated in different shades of grey, as indicated.

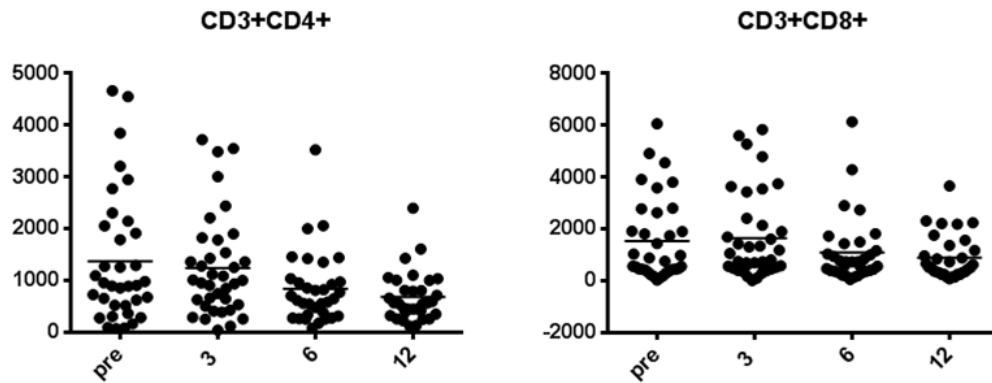

**Suppl. Figure S5** *CD4 and CD8 T cell counts in individual patients before and during iR therapy.* The dots represent individual absolute T cell numbers, and the bar represents the mean at each time point displayed on the horizontal axis (in months).

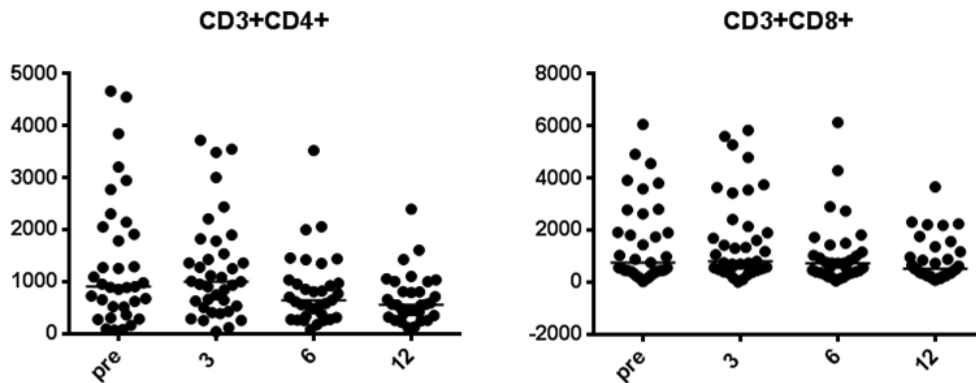

**Suppl. Figure S6** *CD4 and CD8 T cell counts in individual patients before and during iR therapy.* The dots represent individual absolute T cell numbers, and the bar represents the median at each time point displayed on the horizontal axis (in months).

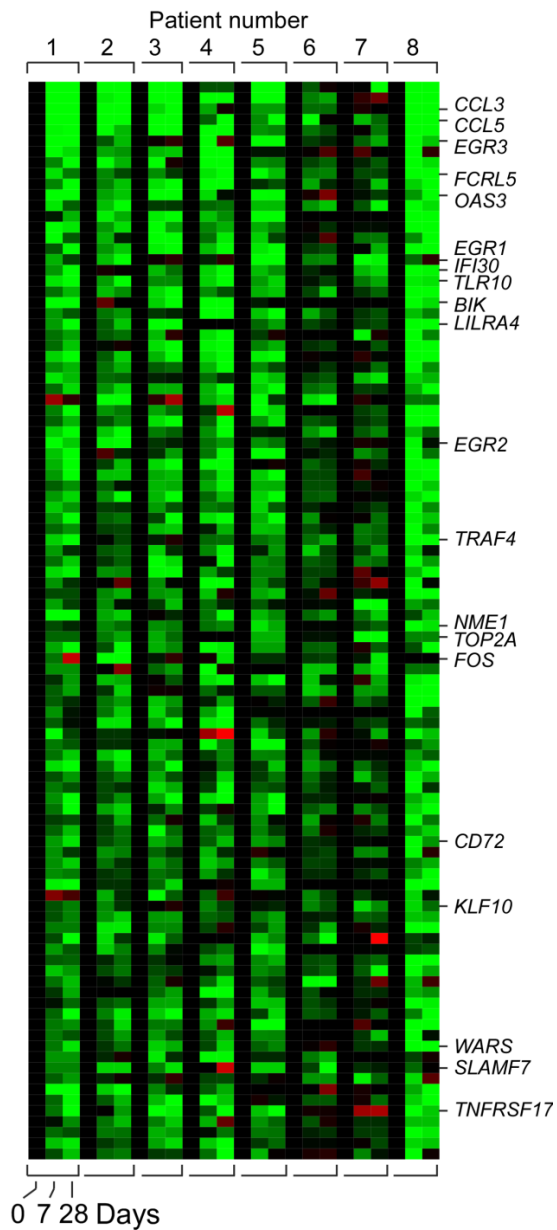

**Figure S7 DNA microarray analysis identifies homogenous gene expression changes in CLL cells during iR therapy.** These heatmaps depict genes that are down regulated in eight different CLL cell samples after 7 and 28 days of iR therapy. The changes in gene expression are depicted for each gene relative to its expression level at baseline before iR therapy (“Day 0”). Shades of green indicate down-regulation of a given gene.



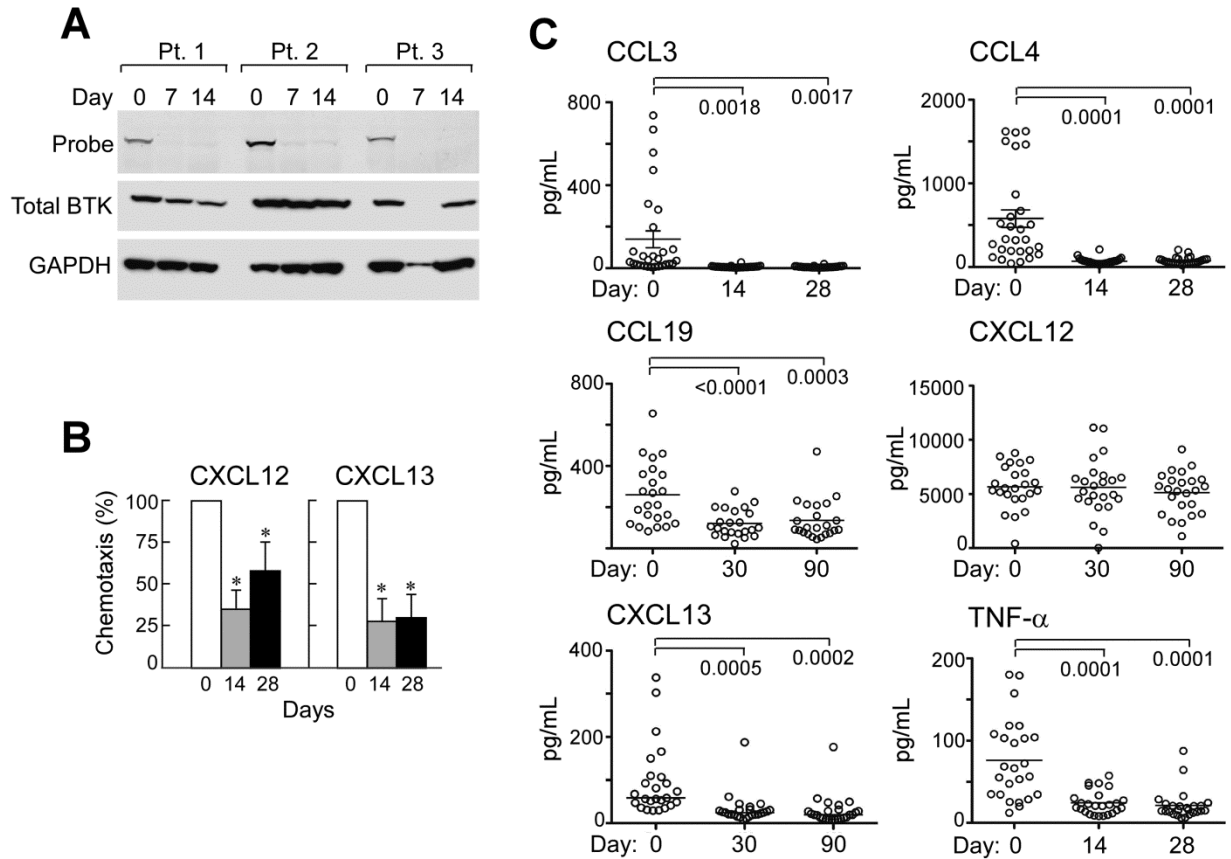

**Figure S8 Correlative studies** (A) CLL cells before and during treatment with ibrutinib that were incubated with a BTK affinity probe PCI-33380. Full occupancy of BTK is shown after 7 days of treatment for 3 independent high-risk CLL patients. (B) Migration of CLL cells before and during treatment with ibrutinib towards 200 ng/mL CXCL12 or 1  $\mu$ g/mL CXCL13. The bar diagram represents the mean chemotaxis ( $\pm$ SEM) of CLL cells from 6 different patients before and after 14 and 28 days of treatment. Chemotaxis toward both chemokines was significantly inhibited. (C) Alters cytokine and chemokine secretion of CLL patients after ibrutinib treatment. The bar diagrams represent the mean CLL patient plasma concentrations for various cytokines and chemokines. Displayed are the means ( $\pm$  SEM) from 28 different patient samples. The secretion of some chemokines was significantly inhibited by ibrutinib treatment, with  $P \leq .0005$ , as indicated by the asterisks describing the comparison of results from each patient during treatment to the results from the relevant sample before treatment.

## **E. References**

1. Aaronson NK, Ahmedzai S, Bergman B, Bullinger M, Cull A, Duez NJ, et al. The European Organization for Research and Treatment of Cancer QLQ-C30: a quality-of-life instrument for use in international clinical trials in oncology. *J Natl Cancer Inst.* 1993; 85(5): 365-76.
2. Honigberg LA, Smith AM, Sirisawad M, Verner E, Loury D, Chang B, et al. The Bruton tyrosine kinase inhibitor PCI-32765 blocks B-cell activation and is efficacious in models of autoimmune disease and B-cell malignancy. *Proceedings of the National Academy of Sciences of the United States of America.* 2010; 107(29): 13075-80.
3. Burger JA, Burger M, Kipps TJ. Chronic Lymphocytic Leukemia B Cells Express Functional CXCR4 Chemokine Receptors That Mediate Spontaneous Migration Beneath Bone Marrow Stromal Cells. *Blood.* 1999; 94(11): 3658-67.
